# Supplementary material for: 3D porous hierarchical Li2FeSiO4/C for rechargeable lithium batteries
Source: Royal Society of Chemistry journal article supplement (doi:10.1039/c5ta02433a), 2015-01-01
Supplement: c5ta02433a1.pdf [file c5ta02433a1.pdf]

## Electronic Supplementary Information

### 3D Porous Hierarchical $\text{Li}_2\text{FeSiO}_4/\text{C}$ for Rechargeable Lithium Batteries

Ling Zhang,<sup>a</sup> Jiangfeng Ni,<sup>\*a</sup> Wencong Wang,<sup>a</sup> Jun Guo<sup>b</sup> and Liang Li<sup>\*a</sup>

<sup>a</sup>College of Physics, Optoelectronics and Energy, Soochow University, Suzhou 215006, China

<sup>b</sup>Testing and Analysis Center, Soochow University, Suzhou 215123, China

\*Corresponding authors. Tel/Fax: +81-512-67875503

E-mail addresses: jeffni@suda.edu.cn (J. Ni), lli@suda.edu.cn (L. Li).

#### Materials characterization

Crystallographic information of the samples was identified by X-ray diffraction (XRD) using a Rigaku Dmax-2400 automatic diffractometer ( $\text{Cu } K\alpha$ ). Material shape and morphology were observed by scanning electron microscopy (SEM, Hitachi S-4800) and transmission electron microscopy (TEM, FEI Tecnai G2 T20). Raman spectroscopy measurements were conducted on a JY HR800 spectrometer using an excited HeNe laser (633 nm). Thermogravimetric (TG) analysis was performed on a TG/DTA-7300 thermal analyzer (Seko). Nitrogen adsorption and desorption isotherms were measured on a Tristar 3020 micropore analyzer (Micromeritics).

#### Electrochemical evaluation

Electrochemical tests were performed on a 2032-type coin cell. The working electrodes were composed of 80 wt% active material, 10 wt% acetylene black, and 10 wt% polyvinylidene fluoride binder. The mass loading for the composite electrode is  $2.0\text{--}2.5 \text{ mg cm}^{-2}$ . Li foil was used as the counter electrode and GFA glass fiber filters (Whatman) as separator. The electrolyte is  $1 \text{ mol l}^{-1} \text{ LiPF}_6$  solution dissolved in ethylene carbonate/dimethyl carbonate (1:1 by volume). Cyclic voltammetry and electrochemical impedance spectroscopy were conducted on a CHI 660E electrochemical workstation. Galvanostatic tests were carried out on a Land battery test system.

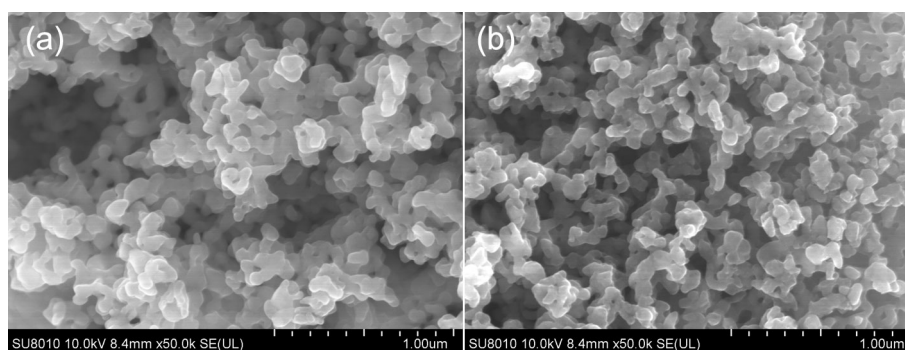

**Figure S1.** SEM images of 3D porous hierarchical  $\text{Li}_2\text{FeSiO}_4/\text{C}$ .

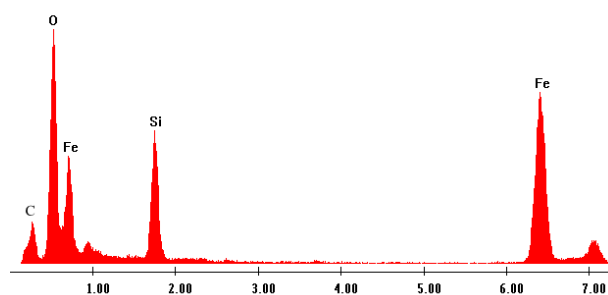

**Figure S2.** Energy dispersive X-ray spectroscopy of 3D porous  $\text{Li}_2\text{FeSiO}_4/\text{C}$ .

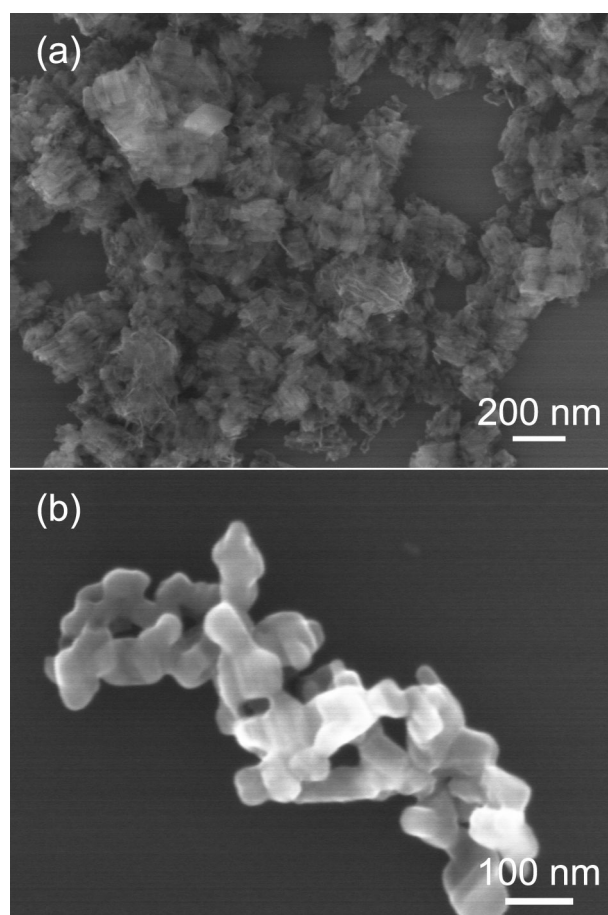

**Figure S3.** SEM images of (a) hydrothermal intermediate and (b) 3D  $\text{Li}_2\text{FeSiO}_4$ .

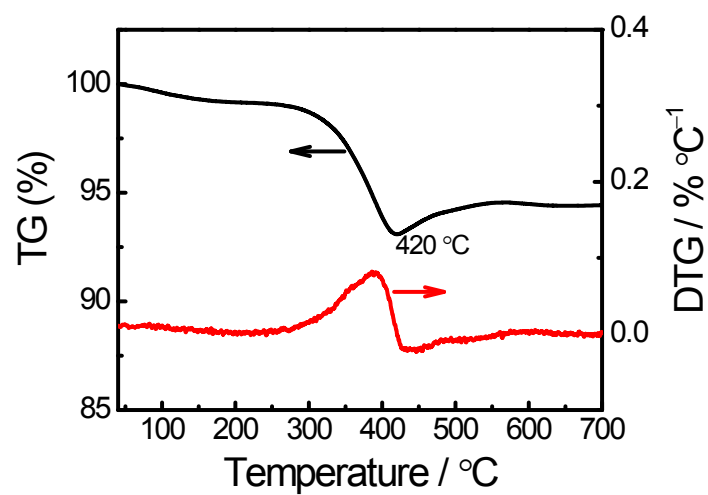

**Figure S4.** TG and DTG curves of 3D porous  $\text{Li}_2\text{FeSiO}_4/\text{C}$ .

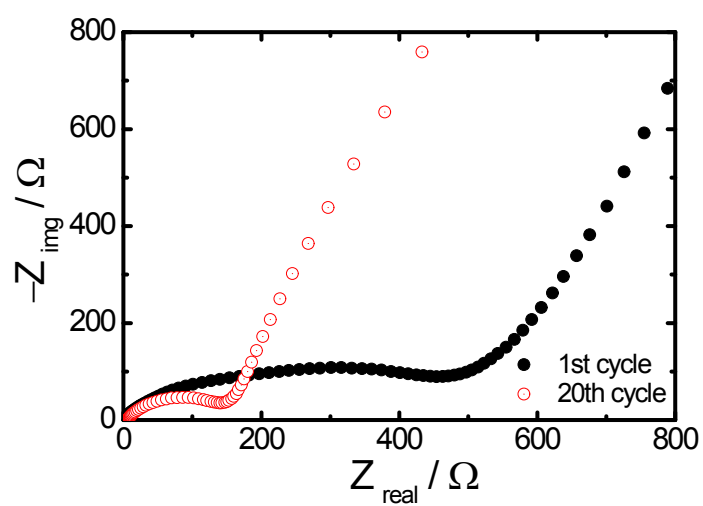

**Figure S5.** Nyquist plots of the impedance spectra of the 3D porous  $\text{Li}_2\text{FeSiO}_4/\text{C}$  after one and 20 cycles.

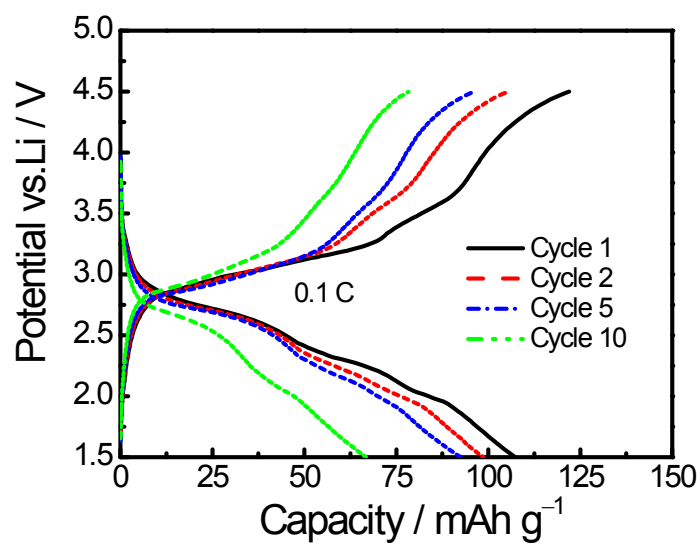

**Figure S6.** Typical galvanostatic curves of 3D porous  $\text{Li}_2\text{FeSiO}_4$  after activation.

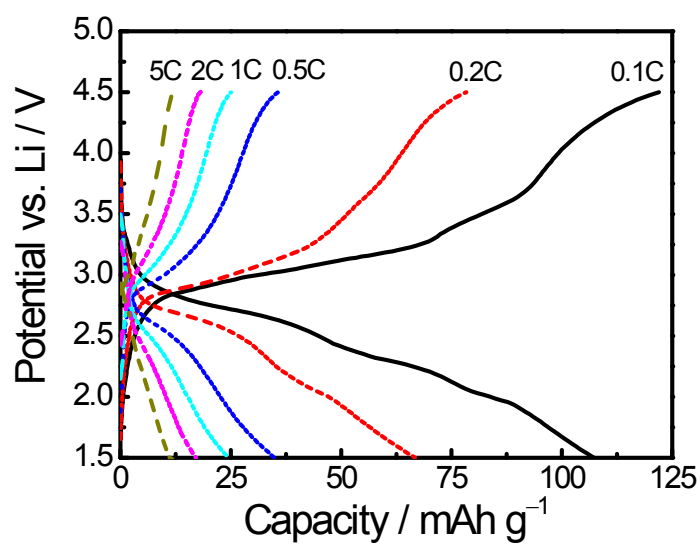

**Figure S7.** Rate capability of 3D porous  $\text{Li}_2\text{FeSiO}_4$ .
